# Supplementary material
Source: Elsevier journal article supplement (https://www.sciencedirect.com/science/article/pii/S2530016421001853)
Supplement: mmc1 [file S2530016421001853:mmc1.docx]

APÉNDICE A. Encuesta de uso

| **ENCUESTA USO DE SISTEMAS FLASH** |
| --- |

**Uso de sistema Flash**

*En las siguientes preguntas marque una opción o escriba una X en el cajetín [ ] de la respuesta adecuada [X].*

- Usuario de sistema Flash: menos de 3 meses [ ] / 3-6 meses [ ] / 6-12 meses [ ] / más de 12 meses [ ]
- Usuario de sistema Flash de forma continua [ ] u ocasional [ ]
- Ha realizado curso educativo sobre sistema Flash: sí [ ] no [ ]
- Además de utilizar el sistema Flash, ¿cuándo mide la glucemia capilar?
- Siempre que tengo que inyectarme insulina o tomar alguna decisión, con el fin de estar seguro del valor de glucosa [ ]
- Solamente en determinadas ocasiones [ ]
- Cuando los valores de glucosa del sensor cambian rápidamente: sí [ ] / no [ ]
- En caso de hipoglucemia: sí [ ] / no [ ]
- Cuando los síntomas que tengo no se corresponden con la lectura: sí [ ] / no [ ]
- En situaciones especiales (ej: ejercicio): sí [ ] / no [ ]
- Desde que utilizo el sistema Flash ya no mido casi nunca la glucemia capilar [ ]
- Habitualmente, ¿Cuántas determinaciones de glucemia capilar realiza al día?
- Más de 3/día [ ]
- 1-3/día [ ]
- Entre 0-1 al día u ocasionalmente [ ]

**Uso de las flechas de tendencia de glucosa del sistema Flash**

**Antes de recibir la Guía Flash**

*En las siguientes preguntas marque una opción o escriba una X en el cajetín [ ] de la respuesta adecuada [X].*

- En el momento de inyectarse insulina, ¿Cambia la dosis de insulina habitual según la tendencia de la glucosa (flecha)? sí [ ] / no [ ]
- En caso de que sí:
- Sin criterio específico (“a ojo”) [ ]
- Si la flecha de tendencia es a la alza ( o )
- Sumo unidades d insulina, aproximadamente ___ UI
- Sumo un % calculado de la dosis de insulina, aproximadamente ___ %
- Si la flecha de tendencia es a la baja ( o )
- Resto unidades de insulina, aproximadamente ___ UI
- Resto un % calculado de la dosis de insulina, aproximadamente ___ %
- En esos momentos del día en que no come, y por lo tanto no se inyecta insulina, si la glucosa está en niveles normales pero la tendencia es baja ( o ), ¿Toma alguna decisión?
- Sí [ ]
- Como alimentos con hidratos de carbono [ ]
- En caso que utilice bomba de infusión subcutánea de insulina, ¿Para la basal o utiliza una basal temporal? [ ]
- No [ ]
- En situaciones especiales, ¿utiliza las flechas de tendencia para tomar alguna decisión?
- Ejercicio sí [ ] / no [ ] Conducción sí [ ] / no [ ] Estrés o enfermedad sí [ ] / no [ ]

**Después de haber recibido la Guía Flash**

*En las siguientes preguntas marque una opción o escriba una X en el cajetín [ ] de la respuesta adecuada [X].*

- En el momento de inyectarse insulina, ¿Cambia la dosis de insulina habitual según la tendencia de la glucosa (flecha)? sí [ ] / no [ ]
- En caso de que sí:
- Sin criterio específico (“a ojo”) [ ]
- Si la flecha de tendencia es a la alza ( o )
- Sumo unidades d insulina, aproximadamente ___ UI
- Sumo un % calculado de la dosis de insulina, aproximadamente ___ %
- Si la flecha de tendencia es a la baja ( o )
- Resto unidades de insulina, aproximadamente ___ UI
- Resto un % calculado de la dosis de insulina, aproximadamente ___ %
- En esos momentos del día en que no come, y por lo tanto no se inyecta insulina, si la glucosa está en niveles normales pero la tendencia es baja ( o ), ¿Toma alguna decisión?
- Sí [ ]
- Como alimentos con hidratos de carbono [ ]
- En caso que utilice bomba de infusión subcutánea de insulina, ¿Para la basal o utiliza una basal temporal? [ ]
- No [ ]
- En situaciones especiales, ¿utiliza las flechas de tendencia para tomar alguna decisión?
- Ejercicio sí [ ] / no [ ] Conducción sí [ ] / no [ ] Estrés o enfermedad sí [ ] / no [ ]

APÉNDICE B. Encuesta de satisfacción

| **ENCUESTA SATISFACCIÓN GUÍA FLASH** |
| --- |

**Satisfacción del usuario de la Guía Flash**

*En las siguientes preguntas, marque con un número del 1 al 5 según la siguiente escala:*

La Guía Flash me ha ayudado a ajustar el bolo de insulina prandial (de las comidas) según la tendencia de la glucosa (flecha), con un mejor control de la glucosa postprandial

La Guía Flash me ha ayudado a realizar mejores correciones en casos de hiperglucemia o hipoglucemia

La Guía Flash me ha servido para ajustar mejor los controles de glucosa en el ejercicio

La Guía Flash me ha servido para mejorar el control de glucosa en situaciones especiales (ej: conducción, etrés o enfermedad)

Gracias al sistema Flash y a la información de la Guía Flash, evito hipoglucemias antes de presentar síntomas

Considero que con el sistema Flash y con la información de la Guía Flash tengo menos hipoglucemias que antes

En general, considero que la Guía Flash presenta información de forma clara y entendedora

En general, considero que la Guía Flash presenta información útil para el manejo de la diabetes y mi vida diaria

¿Usa la plataforma LibreView para realizar descargas?

- Si [ ]
- No [ ]

**Sugerencias o comentarios sobre la Guía Flash:**

*En este apartado puede escribir si tiene algún comentario o sugerencia sobre la Guía Flash*
